# Supplementary material for: Moderate Beer Consumption Is Associated with Good Physical and Mental Health Status and Increased Social Support
Source: MDPI journal article supplement (doi:10.3390/nu15061519), 2023-03-21
Supplement: s1 [file s1]

## **Supplementary Material for:**

**Moderate beer consumption is associated good physical and  
mental health status and higher social support**

**This file includes:**

Table S1

Figures S1 to S15

**Table S1.** General characteristics of the sample ( $\geq 18$  years) of the Spanish National Health Surveys 2012, 2017

|                                              |               |
|----------------------------------------------|---------------|
| <b>Total (n, %)</b>                          | 43098 (100)   |
| <b>Gender (n, %)</b>                         |               |
| Men                                          | 19716 (45.75) |
| Women                                        | 23382 (54.25) |
| <b>Age (mean, SD)</b>                        | 53.41 (18.39) |
| <b>Age group (n, %)</b>                      |               |
| 18-34                                        | 7309 (16.96)  |
| 35-64                                        | 22870 (53.06) |
| $\geq 65$                                    | 12919 (29.98) |
| <b>Education (n, %)</b>                      |               |
| Primary or no education                      | 13684 (31.79) |
| Secondary                                    | 22316 (51.83) |
| University                                   | 7053 (16.38)  |
| <b>Occupational social class (n, %)</b>      |               |
| Low                                          | 26312 (63.02) |
| Middle                                       | 7860 (18.82)  |
| High                                         | 7582 (18.16)  |
| <b>Resident place (n, %)</b>                 |               |
| Rural                                        | 10165 (23.59) |
| Suburban                                     | 27803 (64.51) |
| Urban                                        | 5130 (11.90)  |
| <b>Year of survey (n, %)</b>                 |               |
| 2012                                         | 20587 (47.77) |
| 2017                                         | 22511 (52.23) |
| <b>Leisure time physical activity (n, %)</b> |               |
| Never                                        | 18002 (41.79) |
| Occasionally                                 | 16414 (38.11) |
| Several times per month                      | 4630 (10.75)  |
| Several times per week                       | 4026 (9.35)   |
| <b>Fruit intake (n, %)</b>                   |               |
| Almost never or never                        | 1260 (2.93)   |
| Less than once per week                      | 1377 (3.20)   |
| Once or twice per week                       | 3618 (8.40)   |
| Three or more times per week, but not daily  | 8255 (19.17)  |
| Once or more times per day                   | 28549 (66.30) |
| <b>Vegetables intake (n, %)</b>              |               |
| Almost never or never                        | 521 (1.21)    |
| Less than once per week                      | 981 (2.28)    |
| Once or twice per week                       | 4776 (11.10)  |
| Three or more times per week, but not daily  | 17522 (40.70) |
| Once or more times per day                   | 19248 (44.71) |
| <b>Sweets intake (n, %)</b>                  |               |
| Almost never or never                        | 7475 (17.38)  |
| Less than once per week                      | 7419 (17.24)  |
| Once or twice per week                       | 8687 (20.19)  |
| Three or more times per week, but not daily  | 7556 (17.56)  |

**Table S1. Continued**

|                                             |               |
|---------------------------------------------|---------------|
| Once or more times per day                  | 11885 (27.63) |
| <b>Sweetened beverages intake (n, %)</b>    |               |
| Almost never or never                       | 21665 (50.39) |
| Less than once per week                     | 8103 (18.84)  |
| Once or twice per week                      | 6052 (14.08)  |
| Three or more times per week, but not daily | 3407 (7.92)   |
| Once or more times per day                  | 3772 (8.77)   |
| <b>Fast food intake (n, %)</b>              |               |
| Almost never or never                       | 20391 (47.42) |
| Less than once per week                     | 11727 (27.27) |
| Once or twice per week                      | 8568 (19.93)  |
| Three or more times per week, but not daily | 1795 (4.17)   |
| Once or more times per day                  | 521 (1.21)    |
| <b>Snacks intake (n, %)</b>                 |               |
| Almost never or never                       | 19293 (44.86) |
| Less than once per week                     | 12344 (28.70) |
| Once or twice per week                      | 8538 (19.85)  |
| Three or more times per week, but not daily | 2285 (5.32)   |
| Once or more times per day                  | 547 (1.27)    |
| <b>Body Mass Index (n, %)</b>               |               |
| Insufficient weight                         | 750 (1.87)    |
| Normal weight                               | 16819 (41.89) |
| Overweight                                  | 15353 (38.23) |
| Obesity                                     | 7231 (18.01)  |
| <b>Tobacco use (n, %)</b>                   |               |
| Never                                       | 22313 (51.83) |
| Ex-smoker                                   | 10120 (23.50) |
| Current smoker                              | 10620 (24.67) |
| <b>Self-rated health status (n, %)</b>      |               |
| Good                                        | 28670 (66.52) |
| Poor                                        | 14428 (33.48) |
| <b>Type of limitations (n, %)</b>           |               |
| Physical                                    | 9558 (22.18)  |
| Mental                                      | 590 (1.37)    |
| Both                                        | 1248 (2.90)   |
| None                                        | 31685 (73.55) |
| <b>Intensity of limitations (n, %)</b>      |               |
| None                                        | 31685 (73.54) |
| Mild                                        | 9221 (21.40)  |
| Severe                                      | 2181 (5.06)   |
| <b>Mental health terciles (n, %)</b>        |               |
| Good                                        | 35605 (85.34) |
| Medium                                      | 4479 (10.74)  |
| Poor                                        | 1638 (3.92)   |

**Table S1. Continued**

|                                                    |               |
|----------------------------------------------------|---------------|
| <b>Social support terciles (<i>n</i>, %)</b>       |               |
| Good                                               | 34862 (85.09) |
| Medium                                             | 5503 (13.43)  |
| Poor                                               | 608 (1.42)    |
| <b>Abusive alcohol consumption (<i>n</i>, %)</b>   |               |
| Never                                              | 23061 (53.68) |
| Not in the last 12 months                          | 6350 (14.78)  |
| Less than once a month                             | 11085 (25.80) |
| Monthly                                            | 947 (2.20)    |
| Weekly                                             | 1381 (3.21)   |
| Daily or almost daily                              | 138 (0.32)    |
| <b>Alcohol consumption (<i>n</i>, %)</b>           |               |
| Abstainer                                          | 8929 (20.87)  |
| Ex-drinker                                         | 6350 (14.84)  |
| Occasional                                         | 11421 (26.69) |
| Beer moderate                                      | 5468 (12.78)  |
| Beer high                                          | 1017 (2.38)   |
| Wine moderate                                      | 4756 (11.12)  |
| Wine high                                          | 1010 (2.36)   |
| Spirits moderate                                   | 844 (1.97)    |
| Spirits high                                       | 272 (0.64)    |
| Vermouth moderate                                  | 78 (0.18)     |
| Vermouth high                                      | 42 (0.10)     |
| Liquors moderate                                   | 91 (0.21)     |
| Liquors high                                       | 47 (0.11)     |
| Locals moderate                                    | 124 (0.29)    |
| Locals high                                        | 53 (0.12)     |
| Mixed moderate                                     | 1741 (4.07)   |
| Mixed high                                         | 544 (1.27)    |
| <b>Type of drinker (<i>n</i>, %)</b>               |               |
| Abstainer                                          | 8929 (20.87)  |
| Ex-drinker                                         | 6350 (14.84)  |
| Occasional                                         | 11421 (26.69) |
| Beer                                               | 6485 (15.16)  |
| Wine                                               | 5766 (13.48)  |
| Spirits                                            | 1116 (2.61)   |
| Vermouth                                           | 120 (0.28)    |
| Liquors                                            | 138 (0.32)    |
| Locals                                             | 177 (0.41)    |
| Mixed                                              | 2285 (5.34)   |
| <b>Alcohol consumption intensity (<i>n</i>, %)</b> |               |
| Abstainer                                          | 8929 (20.89)  |
| Ex-drinker                                         | 6350 (14.84)  |
| Occasional                                         | 11421 (26.69) |
| Moderate                                           | 13102 (30.62) |
| High                                               | 2985 (6.98)   |

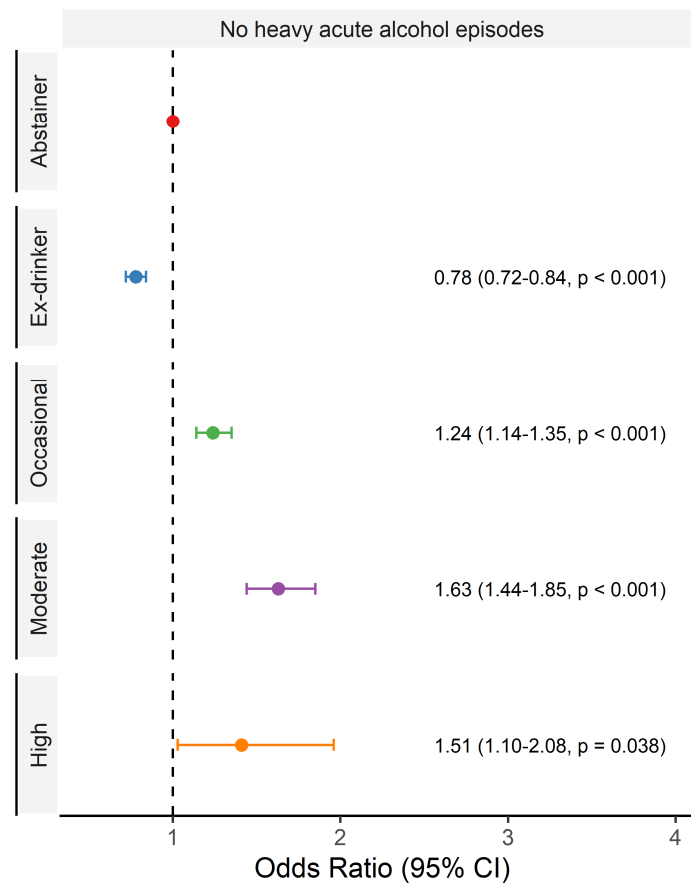

**Figure S1.** Odds Ratio and 95% Confidence Intervals of reporting good self-perceived health in the Spanish adult population ( $\geq 18$  years) in those who never had an acute heavy drinking episode according to beer consumption. Drinkers were classified as occasional (a maximum of 3 days per month), moderate (Women: up to 12 g of alcohol per day, Men: up to 24 g of alcohol per day) or heavy (Women: more than 12 g of alcohol per day, Men: more than 24 g of alcohol per day). Analyses adjusted for age, gender, social class, educational level, year of the survey, place of residence, physical activity, diet, tobacco, and body mass index. National Health Survey of Spain 2012, 2017.

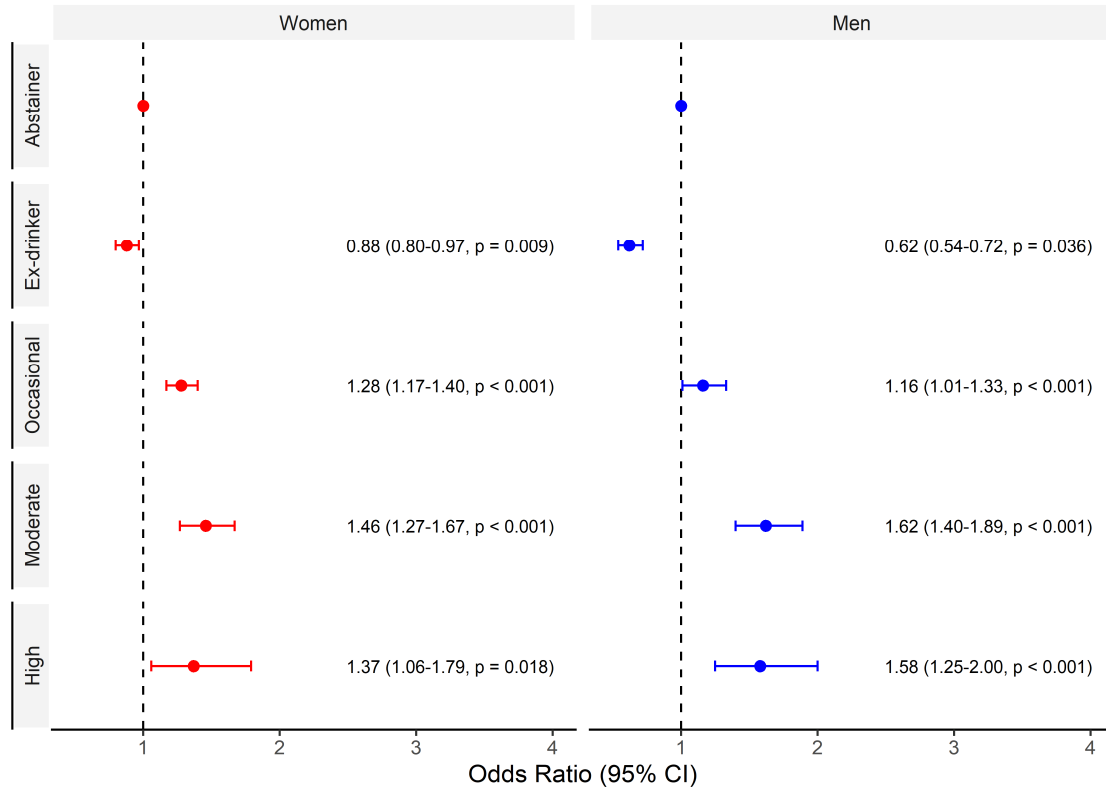

**Figure S2.** Odds Ratio and 95% Confidence Intervals of reporting good self-perceived health in the Spanish adult population ( $\geq 18$  years) by gender according to beer consumption. Drinkers were classified as occasional (a maximum of 3 days per month), moderate (Women: up to 12 g of alcohol per day, Men: up to 24 g of alcohol per day) or high (Women: more than 12 g of alcohol per day, Men: more than 24 g of alcohol per day). Analyses adjusted for age, gender, social class, educational level, year of the survey, place of residence, physical activity, diet, tobacco, and body mass index. National Health Survey of Spain 2012, 2017.

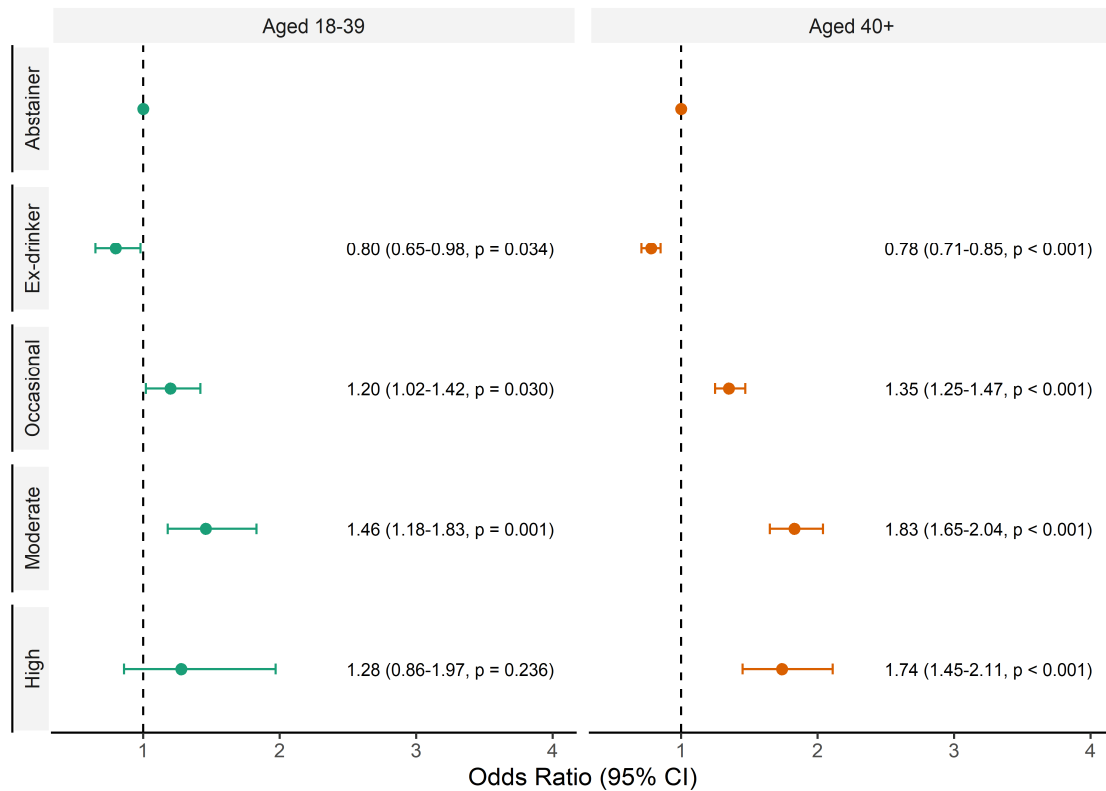

**Figure S3.** Odds Ratio and 95% Confidence Intervals of reporting good self-perceived health in the Spanish adult population ( $\geq 18$  years) by age groups according to beer consumption. Drinkers were classified as occasional (a maximum of 3 days per month), moderate (Women: up to 12 g of alcohol per day, Men: up to 24 g of alcohol per day) or high (Women: more than 12 g of alcohol per day, Men: more than 24 g of alcohol per day). Analyses adjusted for age, gender, social class, educational level, year of the survey, place of residence, physical activity, diet, tobacco, and body mass index. National Health Survey of Spain 2012, 2017.

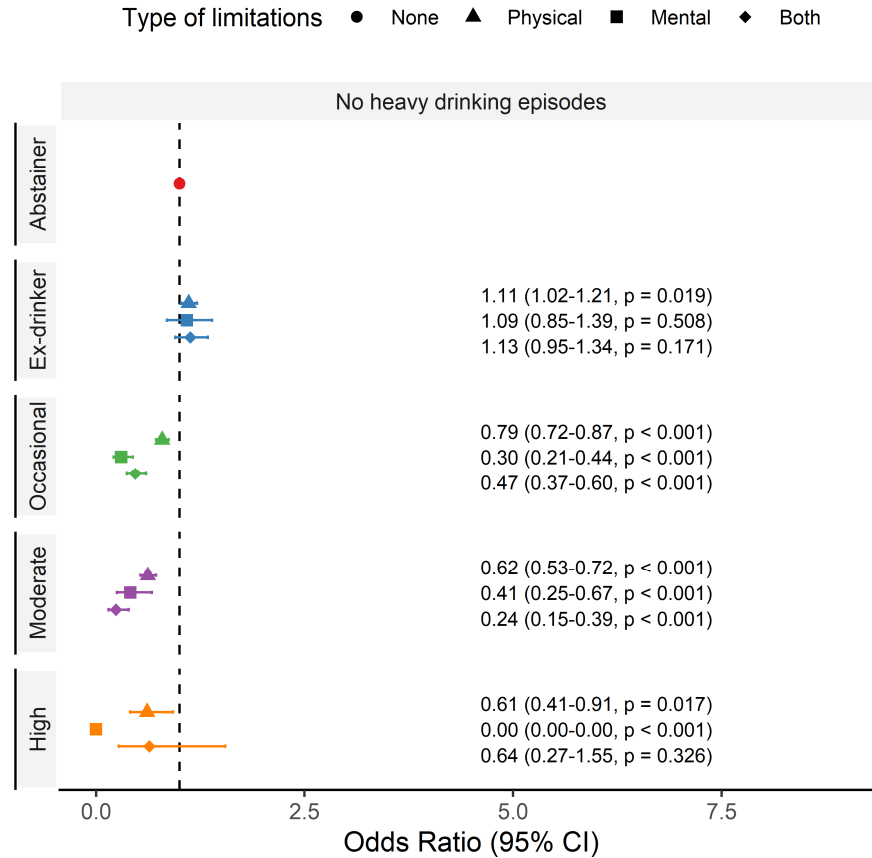

**Figure S4.** Odds Ratio and 95% Confidence Intervals of reporting daily physical, mental or both limitations in the Spanish adult population ( $\geq 18$  years) in those who never had an acute heavy drinking episode according to beer consumption. Drinkers were classified as occasional (a maximum of 3 days per month), moderate (Women: up to 12 g of alcohol per day, Men: up to 24 g of alcohol per day) or high (Women: more than 12 g of alcohol per day, Men: more than 24 g of alcohol per day). Analyses adjusted for age, gender, social class, educational level, year of the survey, place of residence, physical activity, diet, tobacco, and body mass index. National Health Survey of Spain 2012, 2017.



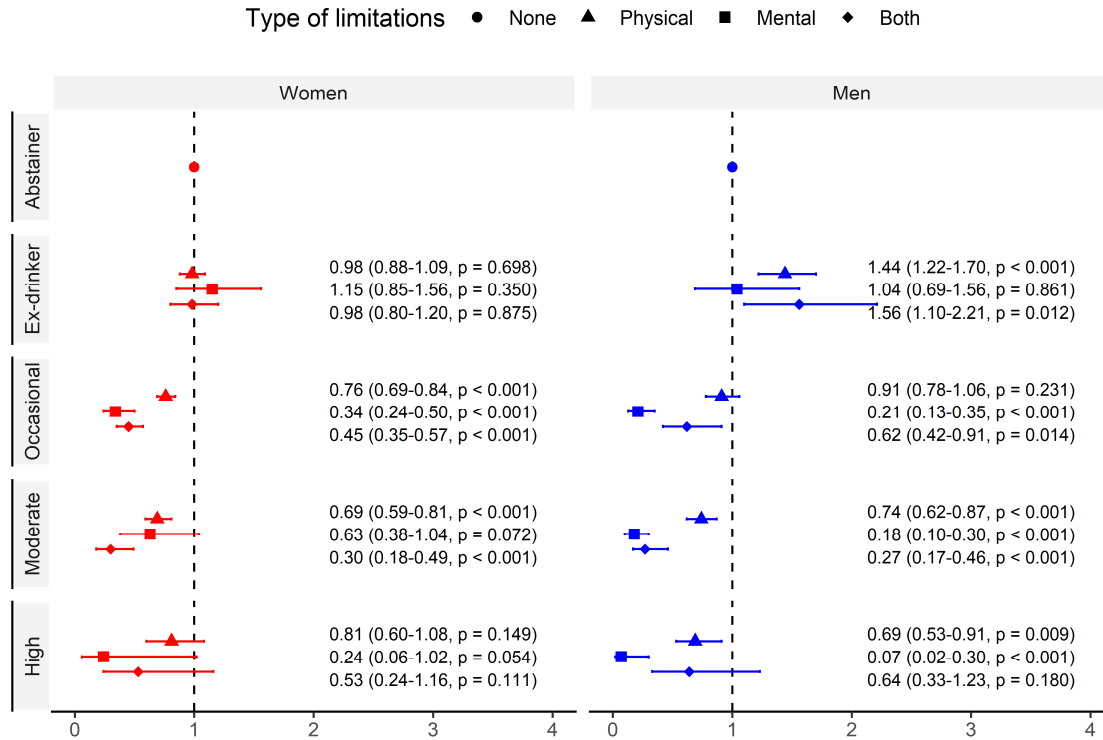

**Figure S5.** Odds Ratio and 95% Confidence Intervals of reporting daily physical, mental or both limitations in the Spanish adult population ( $\geq 18$  years) by gender according to beer consumption. Drinkers were classified as occasional (a maximum of 3 days per month), moderate (Women: up to 12 g of alcohol per day, Men: up to 24 g of alcohol per day) or high (Women: more than 12 g of alcohol per day, Men: more than 24 g of alcohol per day). Analyses adjusted for age, gender, social class, educational level, year of the survey, place of residence, physical activity, diet, tobacco, and body mass index. National Health Survey of Spain 2012, 2017.

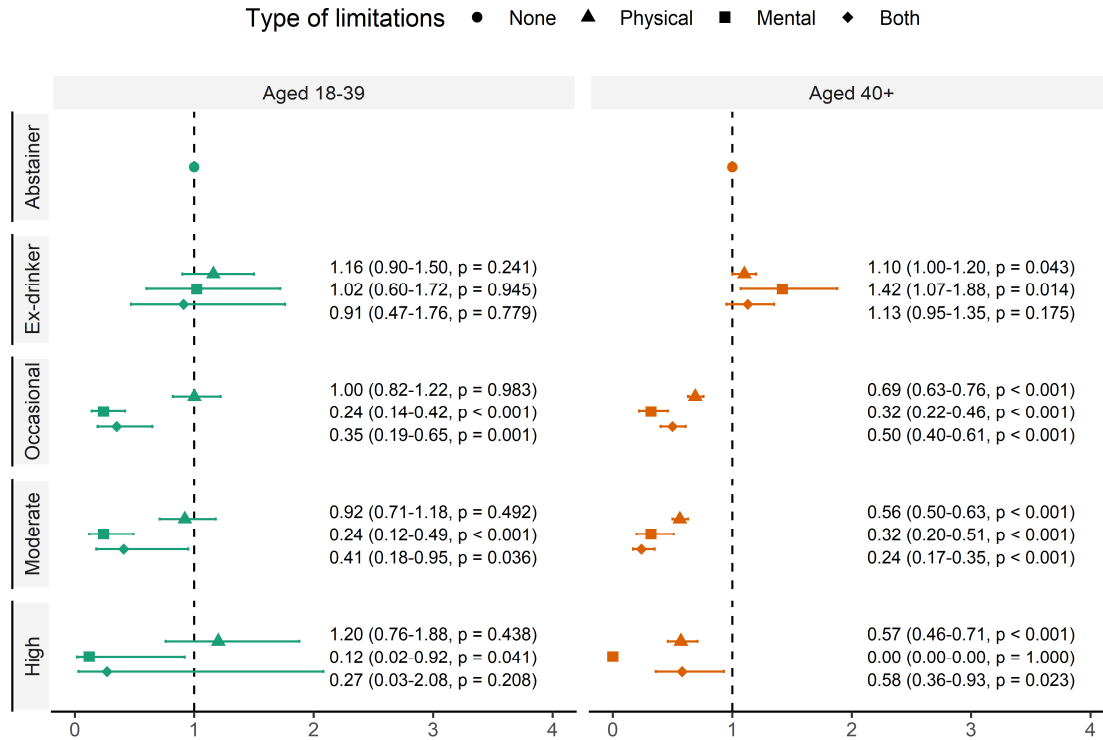

**Figure S6.** Odds Ratio and 95% Confidence Intervals of reporting daily physical, mental or both limitations in the Spanish adult population ( $\geq 18$  years) by age groups according to beer consumption. Drinkers were classified as occasional (a maximum of 3 days per month), moderate (Women: up to 12 g of alcohol per day, Men: up to 24 g of alcohol per day) or high (Women: more than 12 g of alcohol per day, Men: more than 24 g of alcohol per day). Analyses adjusted for age, gender, social class, educational level, year of the survey, place of residence, physical activity, diet, tobacco, and body mass index. National Health Survey of Spain 2012, 2017.

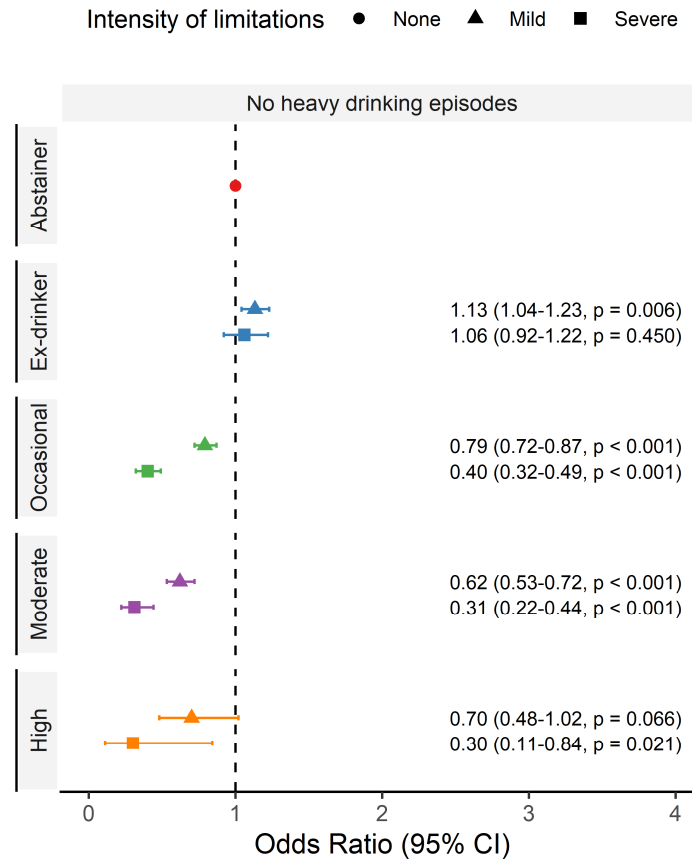

**Figure S7.** Odds Ratio and 95% Confidence Intervals of reporting daily mild or severe limitations in the Spanish adult population ( $\geq 18$  years) in those who never had an acute heavy drinking episode according to beer consumption. Drinkers were classified as occasional (a maximum of 3 days per month), moderate (Women: up to 12 g of alcohol per day, Men: up to 24 g of alcohol per day) or high (Women: more than 12 g of alcohol per day, Men: more than 24 g of alcohol per day). Analyses adjusted for age, gender, social class, educational level, year of the survey, place of residence, physical activity, diet, tobacco, and body mass index. National Health Survey of Spain 2012, 2017.

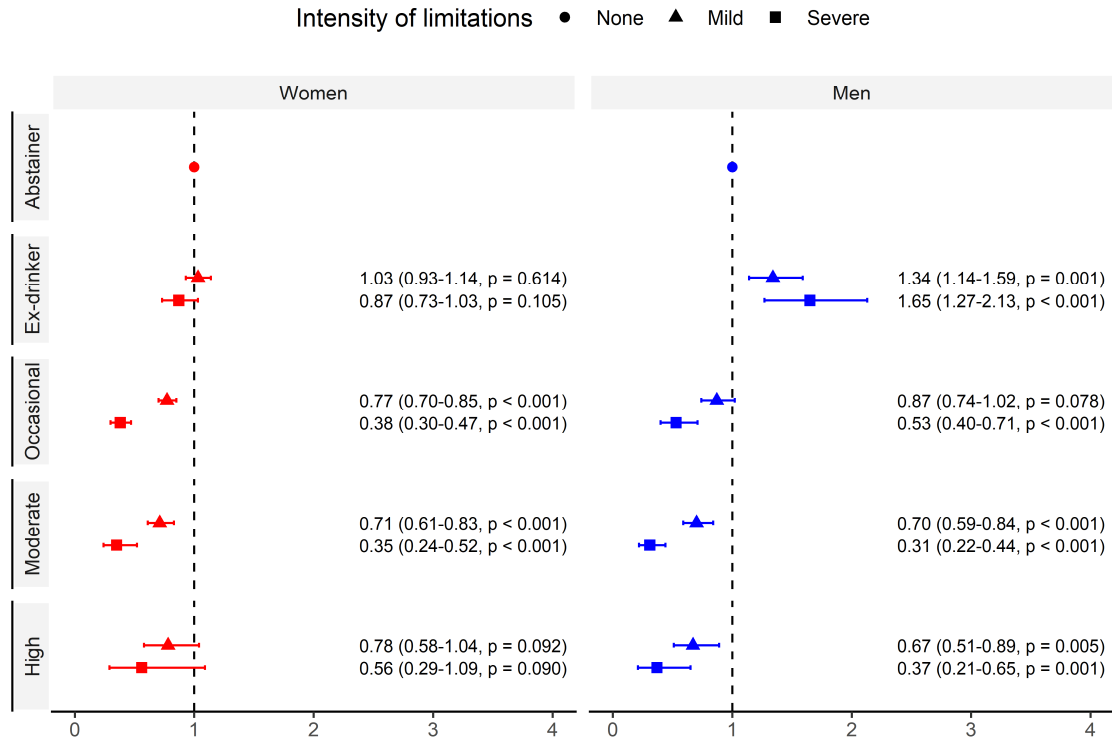

**Figure S8.** Odds Ratio and 95% Confidence Intervals of reporting daily mild or severe limitations in the Spanish adult population ( $\geq 18$  years) by gender according to beer consumption. Drinkers were classified as occasional (a maximum of 3 days per month), moderate (Women: up to 12 g of alcohol per day, Men: up to 24 g of alcohol per day) or high (Women: more than 12 g of alcohol per day, Men: more than 24 g of alcohol per day). Analyses adjusted for age, gender, social class, educational level, year of the survey, place of residence, physical activity, diet, tobacco, and body mass index. National Health Survey of Spain 2012, 2017.

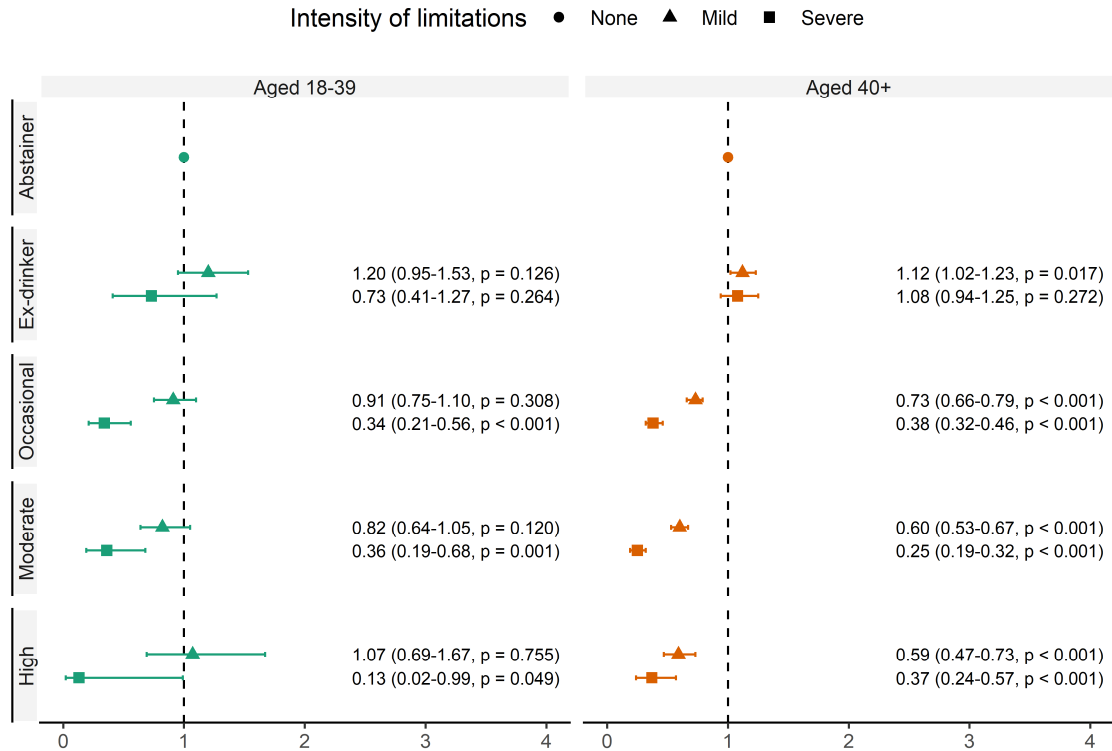

**Figure S9.** Odds Ratio and 95% Confidence Intervals of reporting daily mild or severe limitations in the Spanish adult population ( $\geq 18$  years) by age groups according to beer consumption. Drinkers were classified as occasional (a maximum of 3 days per month), moderate (Women: up to 12 g of alcohol per day, Men: up to 24 g of alcohol per day) or high (Women: more than 12 g of alcohol per day, Men: more than 24 g of alcohol per day). Analyses adjusted for age, gender, social class, educational level, year of the survey, place of residence, physical activity, diet, tobacco, and body mass index. National Health Survey of Spain 2012, 2017.

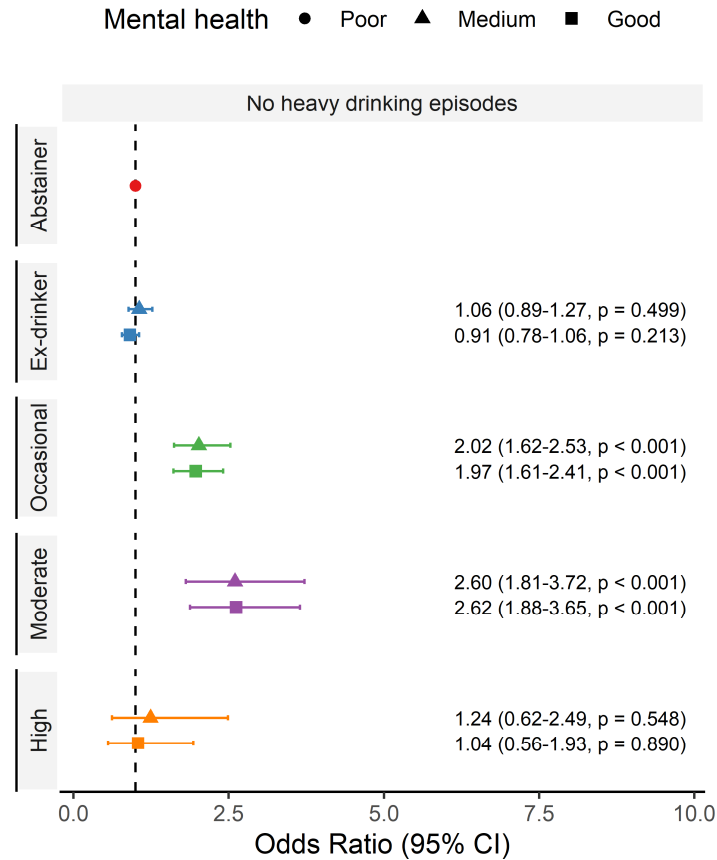

**Figure S10.** Odds Ratio and 95% Confidence Intervals of reporting medium and good mental health in the Spanish adult population ( $\geq 18$  years) in those who never had an acute heavy drinking episode according to beer consumption. Drinkers were classified as occasional (a maximum of 3 days per month), moderate (Women: up to 12 g of alcohol per day, Men: up to 24 g of alcohol per day) or high (Women: more than 12 g of alcohol per day, Men: more than 24 g of alcohol per day). Analyses adjusted for age, gender, social class, educational level, year of the survey, place of residence, physical activity, diet, tobacco, and body mass index. National Health Survey of Spain 2012, 2017.

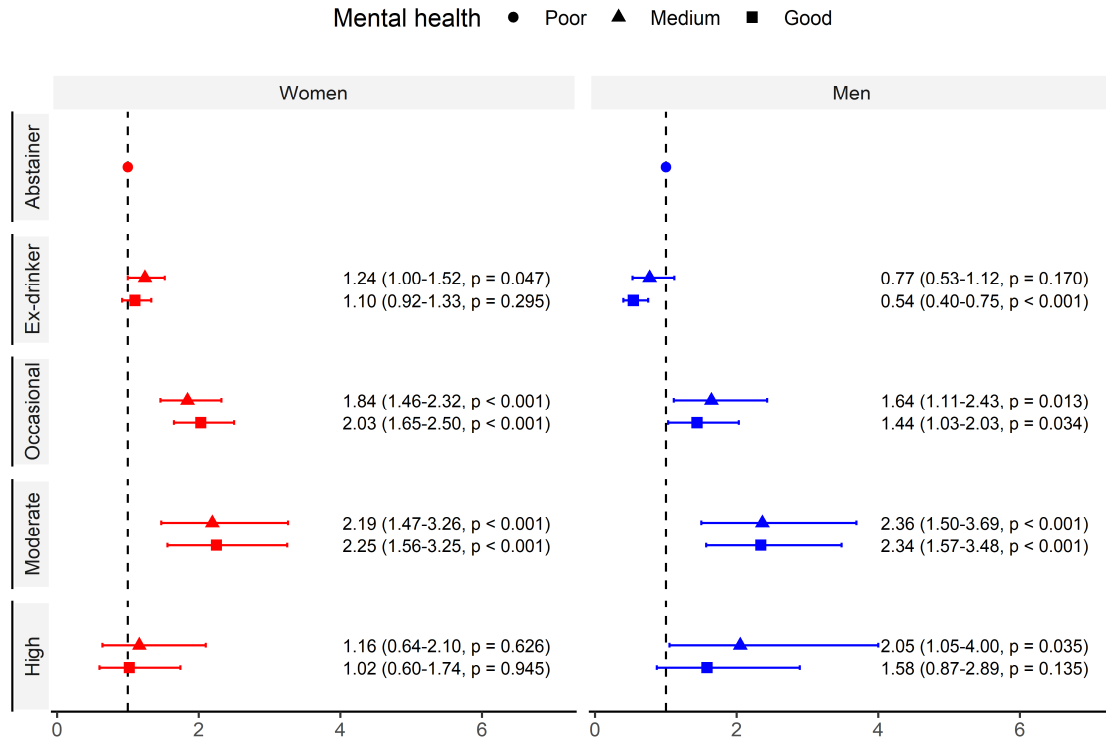

**Figure S11.** Odds Ratio and 95% Confidence Intervals of reporting medium and good mental health in the Spanish adult population ( $\geq 18$  years) by gender according to beer consumption. Drinkers were classified as occasional (a maximum of 3 days per month), moderate (Women: up to 12 g of alcohol per day, Men: up to 24 g of alcohol per day) or high (Women: more than 12 g of alcohol per day, Men: more than 24 g of alcohol per day). Analyses adjusted for age, gender, social class, educational level, year of the survey, place of residence, physical activity, diet, tobacco, and body mass index. National Health Survey of Spain 2012, 2017.

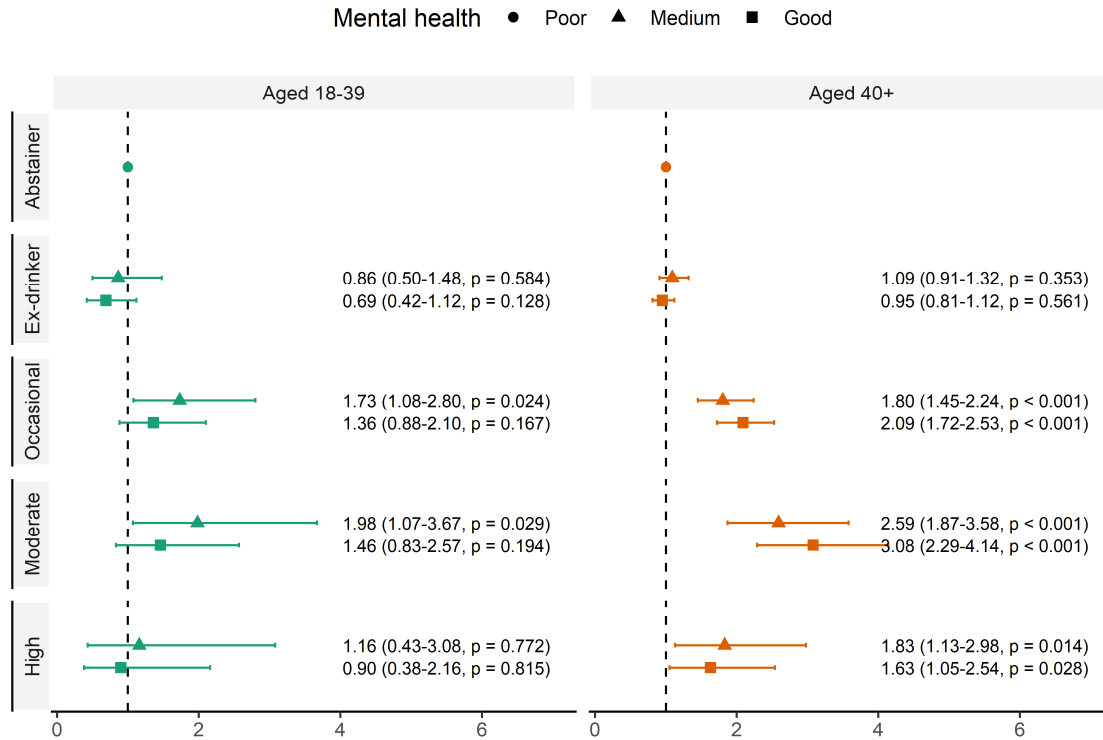

**Figure S12.** Odds Ratio and 95% Confidence Intervals of reporting medium and good mental health in the Spanish adult population ( $\geq 18$  years) by age groups according to beer consumption. Drinkers were classified as occasional (a maximum of 3 days per month), moderate (Women: up to 12 g of alcohol per day, Men: up to 24 g of alcohol per day) or high (Women: more than 12 g of alcohol per day, Men: more than 24 g of alcohol per day). Analyses adjusted for age, gender, social class, educational level, year of the survey, place of residence, physical activity, diet, tobacco, and body mass index. National Health Survey of Spain 2012, 2017.



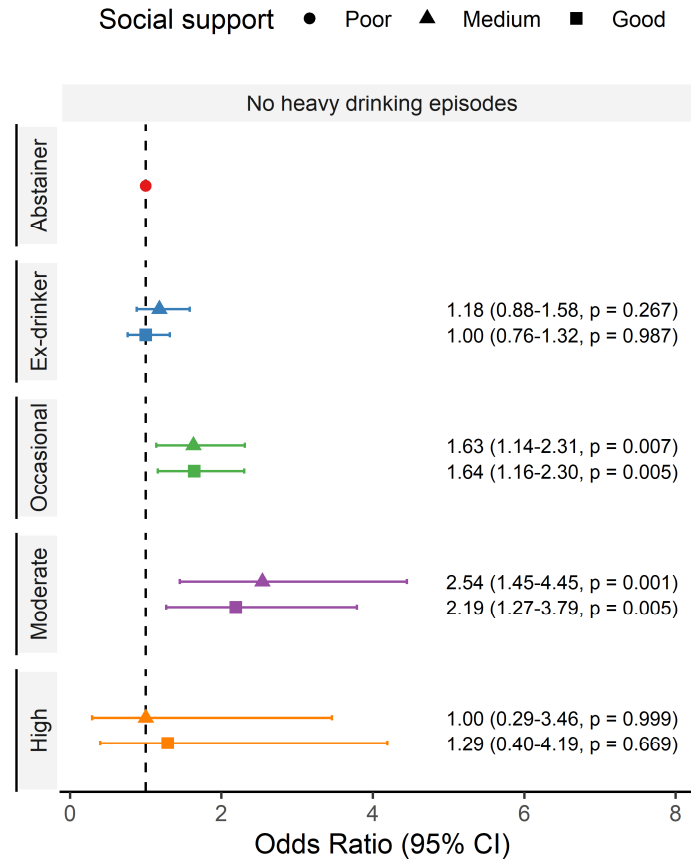

**Figure S13.** Odds Ratio and 95% Confidence Intervals of reporting medium and good social-affective support in the Spanish adult population ( $\geq 18$  years) in those who never had an acute heavy drinking episode according to beer consumption. Drinkers were classified as occasional (a maximum of 3 days per month), moderate (Women: up to 12 g of alcohol per day, Men: up to 24 g of alcohol per day) or high (Women: more than 12 g of alcohol per day, Men: more than 24 g of alcohol per day). Analyses adjusted for age, gender, social class, educational level, year of the survey, place of residence, physical activity, diet, tobacco, and body mass index. National Health Survey of Spain 2012, 2017.

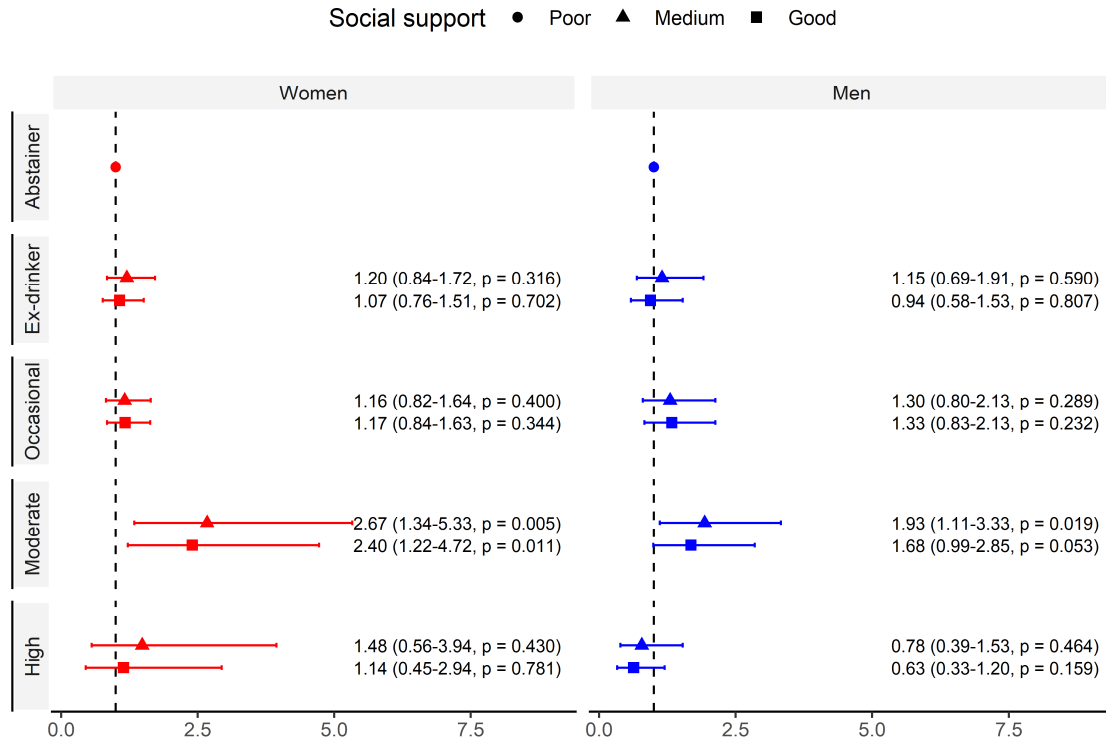

**Figure S14.** Odds Ratio and 95% Confidence Intervals of reporting medium and good social-affective support in the Spanish adult population ( $\geq 18$  years) by gender according to beer consumption. Drinkers were classified as occasional (a maximum of 3 days per month), moderate (Women: up to 12 g of alcohol per day, Men: up to 24 g of alcohol per day) or high (Women: more than 12 g of alcohol per day, Men: more than 24 g of alcohol per day). Analyses adjusted for age, gender, social class, educational level, year of the survey, place of residence, physical activity, diet, tobacco, and body mass index. National Health Survey of Spain 2012, 2017.

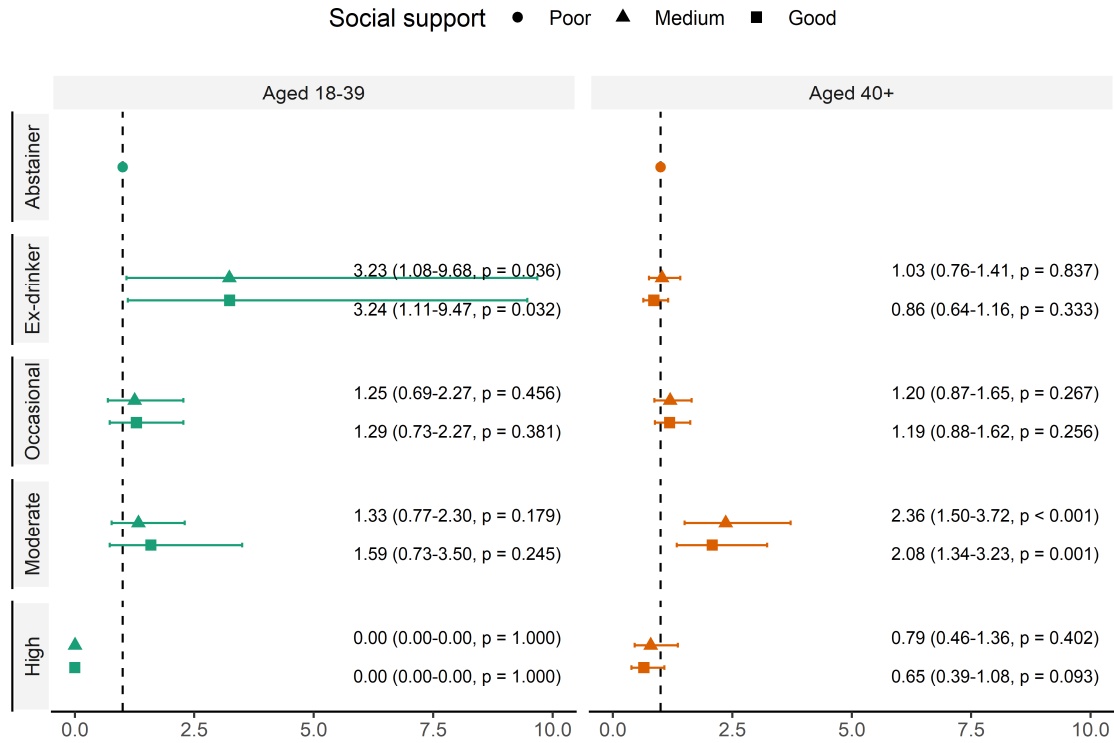

**Figure S15.** Odds Ratio and 95% Confidence Intervals of reporting medium and good social-affective support in the Spanish adult population ( $\geq 18$  years) by age groups according to beer consumption. Drinkers were classified as occasional (a maximum of 3 days per month), moderate (Women: up to 12 g of alcohol per day, Men: up to 24 g of alcohol per day) or high (Women: more than 12 g of alcohol per day, Men: more than 24 g of alcohol per day). Analyses adjusted for age, gender, social class, educational level, year of the survey, place of residence, physical activity, diet, tobacco, and body mass index. National Health Survey of Spain 2012, 2017.
